# Supplementary material
Source: publisher figshare collection journal article supplement (https://sage.figshare.com/ndownloader/files/21786450)
Supplement: Supplementary file 1 [file 21786450]

APPENDIX

| TABLE A. Descriptive Statistics | | | |
| --- | --- | --- | --- |
|  | Mean or  Proportion | SD | Range |
| *Focal Measures* |  |  |  |
| Job pressure | 3.064 | 1.070 | 1 – 5 |
| Role blurring | 2.371 | 1.042 | 1 – 5 |
| WFC | 2.443 | .952 | 1 – 5 |
| Sense of Distributive Injustice | .550 | .693 | -2 – 2 |
| *Controls* |  |  |  |
| Education | 5.287 | 1.460 | 1 – 7 |
| Personal income (thousands) | 69.710 | 42.294 | 2.4 – 300 |
| Professionals = 1 | .454 | –– | 0 – 1 |
| Work hours | 38.263 | 11.125 | 3 – 126 |
| Private sector = 1 | .513 | –– | 0 – 1 |
| Female = 1 | .633 | –– | 0 – 1 |
| Non-white = 1 | .101 | –– | 0 – 1 |
| Age | 49.482 | 10.529 | 22 – 81 |
| Married = 1 | .558 | –– | 0 – 1 |
| Parent = 1 | .389 | –– | 0 – 1 |
| Note: Sample sizes vary slightly across the measures due to missing values. However, the SEM analyses takes missing data into account using full information maximum likelihood. | | | |

| TABLE B. Direct, Indirect, and Total Effects among Focal and Control Variables in the Full Sample (N = 2,219) | | | | |
| --- | --- | --- | --- | --- |
| Outcome |  | Direct Effect | Indirect Effect | Total Effect |
| *Job pressure* |  |  |  |  |
| education | 🡪 job pressure | .037* | –– | .037* |
| income (log) | 🡪 job pressure | .044 | –– | .044 |
| professionals | 🡪 job pressure | .193*** | –– | .193*** |
| work hours | 🡪 job pressure | .025*** | –– | .025*** |
| private | 🡪 job pressure | -.016 | –– | -.016 |
| female | 🡪 job pressure | .402*** | –– | .402*** |
| non-white | 🡪 job pressure | .083 | –– | .083 |
| age | 🡪 job pressure | -.009*** | –– | -.009*** |
| married | 🡪 job pressure | .038 | –– | .038 |
| parent | 🡪 job pressure | .037 | –– | .037 |
| Role blurring |  |  |  |  |
| job pressure | 🡪 role blurring | .220*** | –– | .220*** |
| education | 🡪 role blurring | .040*** | .008* | .048*** |
| income (log) | 🡪 role blurring | .108*** | .010 | .117*** |
| professionals | 🡪 role blurring | .297*** | .042*** | .339*** |
| work hours | 🡪 role blurring | .005** | .005*** | .010*** |
| private | 🡪 role blurring | -.005 | -.004 | -.009 |
| female | 🡪 role blurring | -.090* | .088*** | -.001 |
| non-white | 🡪 role blurring | -.104* | .018 | -.086 |
| age | 🡪 role blurring | -.001 | -.002*** | -.003 |
| married | 🡪 role blurring | .114*** | .008 | .122*** |
| parent | 🡪 role blurring | .081* | .008 | .089* |
| WFC |  |  |  |  |
| job pressure | 🡪 wfc | .440*** | .049*** | .489*** |
| role blurring | 🡪 wfc | .222*** | –– | .222*** |
| education | 🡪 wfc | .023 | .027*** | .051*** |
| income (log) | 🡪 wfc | -.073* | .045* | -.027 |
| professionals | 🡪 wfc | -.048 | .160*** | .112** |
| work hours | 🡪 wfc | .010*** | .013*** | .023*** |
| private | 🡪 wfc | -.015 | -.009 | -.024 |
| female | 🡪 wfc | .004 | .177*** | .180*** |
| non-white | 🡪 wfc | .143** | .017 | .161** |
| age | 🡪 wfc | .004* | -.005*** | -.001 |
| married | 🡪 wfc | -.035 | .044* | .009 |
| parent | 🡪 wfc | .080* | .036 | .116** |
| *Sense of Distributive Injustice* | |  |  |  |
| Job pressure | 🡪 injustice | .146*** | .060*** | .206*** |
| Role blurring | 🡪 injustice | -.012 | .028*** | .016 |
| WFC | 🡪 injustice | .128*** | –– | .128*** |
| *TABLE B continued…* | | | | |
| *TABLE B continued…* | | | | |
| education | 🡪 injustice | .010 | .011** | .022 |
| income (log) | 🡪 injustice | -.413*** | .001 | -.412*** |
| professionals | 🡪 injustice | -.026 | .039** | .012 |
| work hours | 🡪 injustice | .001 | .007*** | .008*** |
| private | 🡪 injustice | -.004 | -.005 | -.010 |
| female | 🡪 injustice | .015 | .082 | .097** |
| non-white | 🡪 injustice | .079 | .034* | .112* |
| age | 🡪 injustice | .006*** | -.001* | .005** |
| married | 🡪 injustice | -.027 | .005 | -.022 |
| parent | 🡪 injustice | .064 | .019 | .084* |
| Note: Unstandardized coefficients are shown. Standard errors are not reported for the sake of presentation (available upon request). **p*<.05; ** *p*<.01; *** *p*<.001 (two tailed test) | | | | |
